# Supplementary material for: Personal Health Record Reach in the Veterans Health Administration: A Cross-Sectional Analysis
Source: PubMed Central journal article supplement (PMC4275468; doi:10.2196/jmir.3751), 2014-12-12
Supplement: jmir_v16i12e272_app1.pdf [file jmir_v16i12e272_app1.pdf]

**Multimedia Appendix 1.** Demographic characteristics by condition, ranked by frequency.

|                                              | Condition<br>N (%)  | Age<br>(Mean±SD) | Gender<br>(%<br>Female) | Race<br>(%<br>White) | High<br>Economic<br>Need | Urban/<br>Rural<br>(%<br>Rural) |
|----------------------------------------------|---------------------|------------------|-------------------------|----------------------|--------------------------|---------------------------------|
| Hypertension                                 | 3405374<br>(56.63%) | 68.80±12.56      | 3.56                    | 62.09                | 27.92                    | 28.43                           |
| Hyperlipidemia                               | 3348383<br>(55.69%) | 67.90±12.82      | 3.86                    | 64.56                | 25.51                    | 28.97                           |
| Diabetes                                     | 1485823<br>(24.71%) | 68.95±11.34      | 2.87                    | 60.92                | 27.68                    | 28.03                           |
| Depression (Major or<br>Minor)               | 1483734<br>(24.68%) | 59.62±14.76      | 9.80                    | 61.87                | 27.20                    | 26.20                           |
| Coronary Artery Disease                      | 1252714<br>(20.83%) | 73.48±10.72      | 1.44                    | 69.16                | 28.12                    | 30.28                           |
| Chronic Obstructive<br>Pulmonary Disease     | 795707<br>(13.23%)  | 69.70±11.56      | 3.96                    | 69.55                | 34.95                    | 32.25                           |
| Post-Traumatic Stress<br>Disorder            | 785953<br>(13.07%)  | 56.18±15.21      | 7.91                    | 59.33                | 11.24                    | 25.94                           |
| Anxiety                                      | 678242<br>(11.28%)  | 58.99±15.73      | 10.39                   | 65.99                | 26.74                    | 26.83                           |
| Alcohol Abuse                                | 665936<br>(11.08%)  | 57.62±12.44      | 3.65                    | 57.20                | 37.22                    | 22.89                           |
| Psychosis                                    | 378498<br>(6.29%)   | 67.73±16.41      | 5.15                    | 61.55                | 31.22                    | 24.66                           |
| Drug Abuse                                   | 342284<br>(5.69%)   | 54.23±10.90      | 5.04                    | 47.81                | 42.53                    | 17.08                           |
| Congestive Heart Failure                     | 296207<br>(4.93%)   | 74.33±11.25      | 1.94                    | 66.29                | 36.57                    | 29.81                           |
| Viral Hepatitis                              | 212222<br>(3.53%)   | 59.79±7.61       | 3.11                    | 49.69                | 44.16                    | 19.01                           |
| Stroke                                       | 206251<br>(3.43%)   | 73.49±11.77      | 3.03                    | 64.73                | 33.75                    | 28.13                           |
| Schizophrenia or<br>Schizoaffective Disorder | 123740<br>(2.06%)   | 59.03±11.69      | 6.92                    | 49.83                | 32.16                    | 19.19                           |
| Traumatic Brain Injury                       | 84299<br>(1.40%)    | 48.08±18.12      | 5.84                    | 63.57                | 18.64                    | 22.71                           |
| Human Immunodeficiency<br>Virus              | 27033<br>(0.45%)    | 55.30±10.35      | 2.83                    | 35.19                | 46.00                    | 10.29                           |
| Spinal Cord Injury                           | 26046<br>(0.43%)    | 62.26±12.77      | 3.91                    | 62.61                | 22.66                    | 24.22                           |
| None of the Above<br>Diseases                | 1119589<br>(18.62%) | 55.12±19.66      | 9.98                    | 56.66                | 24.34                    | 22.05                           |
